# Supplementary material for: Genome-wide, Single-Cell DNA Methylomics Reveals Increased Non-CpG Methylation during Human Oocyte Maturation
Source: PubMed Central journal article supplement — Stem Cell Reports. 2017 Jun 22;9(1):397–407. doi: 10.1016/j.stemcr.2017.05.026 (PMC5511109; doi:10.1016/j.stemcr.2017.05.026), 2017-06-22
Supplement: mmc1.pdf [file mmc1.pdf]

**Stem Cell Reports, Volume 9**

**Supplemental Information**

**Genome-wide, Single-Cell DNA Methylomics Reveals Increased Non-CpG Methylation during Human Oocyte Maturation**

**Bo Yu, Xiao Dong, Silvia Gravina, Önder Kartal, Timothy Schimmel, Jacques Cohen, Drew Tortoriello, Raifa Zody, R. David Hawkins, and Jan Vijg**

Figure S1 (i). Representative photographs of oocytes collected at different maturation stages; (ii). Representative library fragment size distribution on the Bioanalyzer platform. Related to Table 1.

i) A

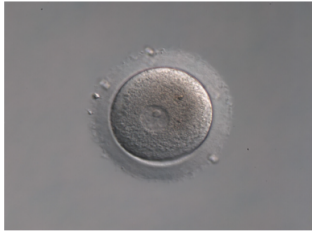

i) B

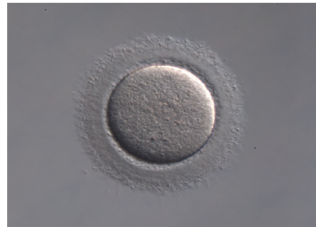

i) C

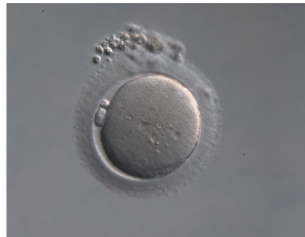

i) D

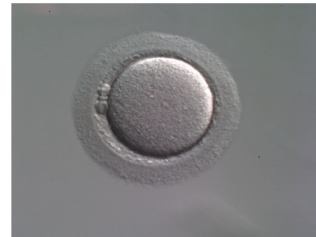

i) E

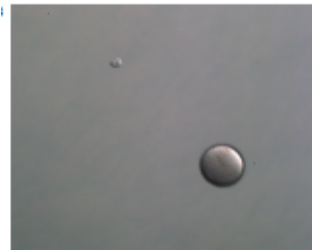

i) F

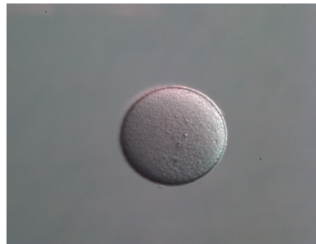

ii)

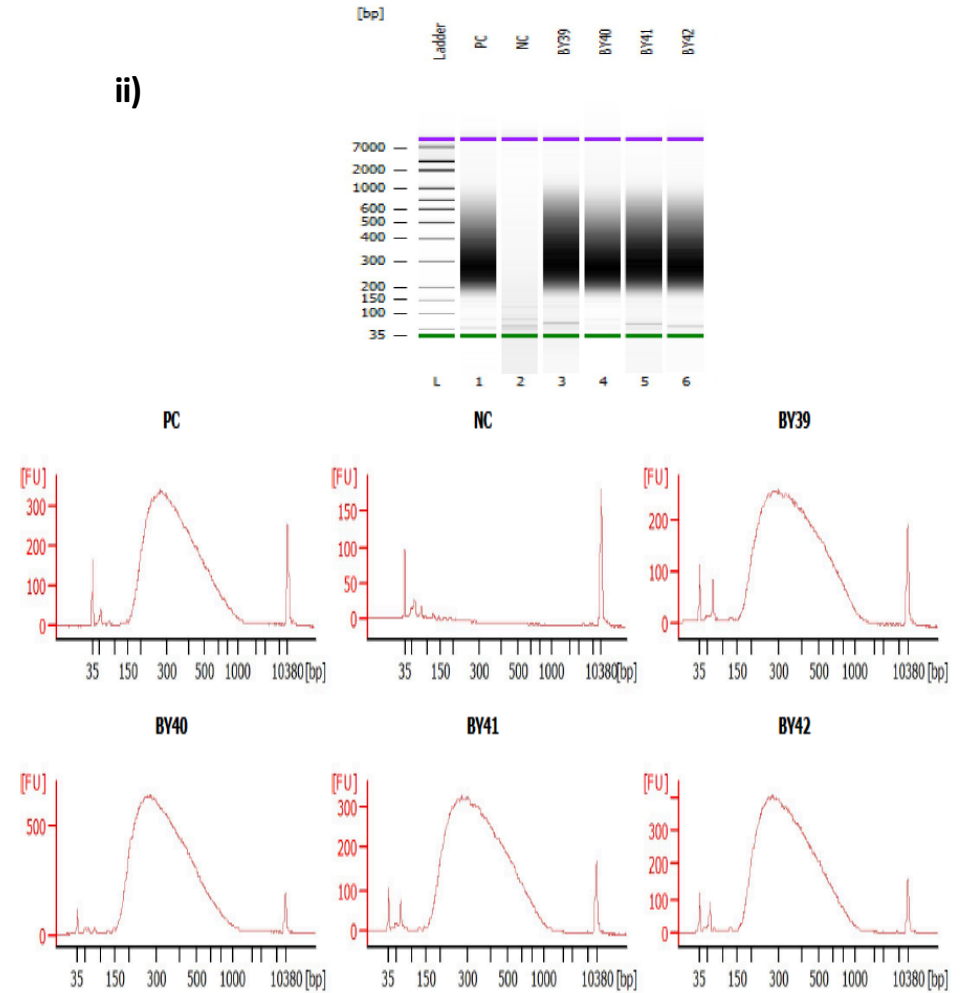

Table S1. Comparison with published SC-WGBS methods. Related to Table 1.

|                                                     | Yu et al                          | Farlik et al                        | Smallwood et al   |
|-----------------------------------------------------|-----------------------------------|-------------------------------------|-------------------|
| One-tube cell lysis and bisulfite conversion        | Yes                               | Yes                                 | Yes               |
| Simultaneous bisulfite conversion and fragmentation | Yes                               | Yes                                 | Yes               |
| Post-bisulfite adaptor tagging                      | Yes                               | Yes                                 | Yes               |
| Commercially available library preparation          | pico Methyseq kit (Zymo Research) | EpiGnome Methyl-Seq kit (Epicenter) | No                |
| Compatible with Illumina primers                    | Yes                               | Yes                                 | No                |
| Compatible with paired-end sequencing               | Yes                               | Yes                                 | Yes               |
| Species/Cell type                                   | human oocyte                      | human, mouse cell lines             | mouse oocyte, ESC |
| Sequencing read length                              | 150bp, single-end                 | 100bp, paired-end                   | 100bp, paired-end |
| Bisulfite conversion rate                           | ≥98.8%                            | >99%                                | ≥97.7%            |
| Median total sequencing reads per single cell       | 23,738,203                        | 4,002,609                           | 15,707,312        |
| Median unique sequencing reads per single cell      | 997,952                           | 617,336                             | 2,746,323         |
| Mean mapping efficiency                             | 29.4%                             | NP*                                 | 20.1%             |
| Median CpG site coverage per single cell            | 1,211,444 **                      | 1,334,685                           | 3,372,259         |
| Bias towards CpG island                             | 0.35                              | 1.4                                 | 2.6               |
| Median non-CpG coverage                             | 18,848,813                        | NP*                                 | 71,512,185        |

\*NP: Not presented in the paper

\*\* for diploid cells (GV, MI oocytes); 972,851 if include haploid MII oocytes

Table S2. HiSeq raw data overview. Related to Table 1.

| Sample_ID | Pt_ID | Oocyte stage | No. quality reads | % mapped reads | % Duplicated reads | No. CpG   | No. CHG or CHH | BS conversion rate |
|-----------|-------|--------------|-------------------|----------------|--------------------|-----------|----------------|--------------------|
| BY06      | B     | GV           | 23,215,291        | 20.6%          | 77.6%              | 1,018,198 | 20,581,390     | 98.9%              |
| BY07      | B     | GV           | 13,126,625        | 25.4%          | 77.6%              | 760,889   | 14,873,484     | 99.1%              |
| BY11      | I     | GV           | 105,931,981       | 40.0%          | 95.7%              | 715,876   | 13,840,703     | 99.2%              |
| BY16      | F     | GV           | 25,196,170        | 29.8%          | 81.6%              | 1,406,393 | 26,873,721     | 99.1%              |
| BY17      | F     | GV           | 40,063,804        | 49.6%          | 92.3%              | 1,197,153 | 22,791,936     | 99.1%              |
| BY19      | G     | GV           | 34,359,315        | 11.9%          | 77.8%              | 987,963   | 18,547,068     | 98.8%              |
| BY20      | A     | GV           | 25,901,314        | 46.2%          | 82.8%              | 1,932,869 | 38,097,390     | 99.4%              |
| BY21      | A     | GV           | 28,891,197        | 44.6%          | 93.5%              | 561,901   | 11,076,421     | 99.3%              |
| BY39      | K     | GV           | 18,790,726        | 22.5%          | 81.9%              | 1,225,734 | 21,800,916     | 99.2%              |
| BY42      | L     | GV           | 27,339,925        | 18.3%          | 86.1%              | 1,314,527 | 23,373,907     | 99.2%              |
| BY02      | D     | MI           | 55,372,126        | 39.1%          | 83.6%              | 3,281,304 | 62,699,783     | 99.1%              |
| BY05      | B     | MI           | 24,261,115        | 22.7%          | 78.4%              | 1,250,165 | 23,872,234     | 99.1%              |
| BY08      | C     | MI           | 19,446,155        | 22.7%          | 70.7%              | 1,313,443 | 26,296,644     | 99.1%              |
| BY09      | H     | MI           | 97,947,116        | 44.1%          | 95.2%              | 773,021   | 15,430,945     | 99.0%              |
| BY13      | A     | MI           | 20,838,975        | 47.9%          | 84.9%              | 1,347,536 | 26,506,071     | 99.0%              |
| BY14      | A     | MI           | 18,544,265        | 45.8%          | 86.9%              | 1,139,071 | 19,900,514     | 99.1%              |
| BY18      | A     | MI           | 34,274,533        | 10.6%          | 78.4%              | 786,087   | 15,294,217     | 98.8%              |
| BY40      | K     | MI           | 24,276,996        | 13.3%          | 69.1%              | 1,621,459 | 29,287,409     | 99.2%              |
| BY41      | L     | MI           | 34,803,285        | 21.5%          | 86.7%              | 1,585,397 | 28,577,652     | 99.3%              |
| BY57      | L     | MI           | 19,283,410        | 30.2%          | 79.5%              | 1,084,221 | 20,559,123     | 99.2%              |
| BY03      | D     | MII          | 11,977,640        | 33.0%          | 81.7%              | 782,631   | 14,432,582     | 99.0%              |
| BY23      | J     | MII          | 20,541,564        | 20.4%          | 83.9%              | 571,683   | 12,039,595     | 99.0%              |
| BY27      | J     | MII          | 18,802,263        | 38.8%          | 84.4%              | 957,739   | 19,150,558     | 99.3%              |
| BY29      | J     | MII          | 15,762,979        | 33.9%          | 83.8%              | 811,224   | 16,161,880     | 99.3%              |
| BY52      | M     | MII          | 25,245,473        | 35.7%          | 92.1%              | 467,504   | 8,957,291      | 99.2%              |
| BY55      | M     | MII          | 17,886,342        | 14.7%          | 70.6%              | 440,056   | 7,824,409      | 99.2%              |
| BY56      | M     | MII          | 21,068,306        | 32.0%          | 82.6%              | 607,245   | 12,512,158     | 99.2%              |
| BY50      | N     | MII          | 21,349,864        | 27.6%          | 87.4%              | 954,668   | 17,042,046     | 99.3%              |
| BY51      | N     | MII          | 25,199,652        | 21.2%          | 91.9%              | 297,668   | 5,725,853      | 99.3%              |
| BY54      | N     | MII          | 19,100,521        | 18.6%          | 81.1%              | 472,642   | 8,481,367      | 99.2%              |

Table S3. Correlation between the methylation levels of 68 oocyte-specific imprinted regions in each of our oocytes and those of different cell types published in Okae *et al.*, 2014. Pearson correlation coefficients are listed. Related to Table 1.

| Correlation with | Oocyte | Sperm | Blastocyst | H9.ES | H1.ES | HUES6.ES | Blood |
|------------------|--------|-------|------------|-------|-------|----------|-------|
| BY06             | 0.90   | -0.54 | 0.69       | -0.36 | -0.36 | -0.13    | -0.22 |
| BY07             | 0.98   | -0.54 | 0.81       | -0.30 | -0.23 | -0.22    | -0.16 |
| BY11             | 0.76   | -0.48 | 0.66       | -0.39 | -0.39 | -0.59    | -0.52 |
| BY16             | 0.79   | -0.42 | 0.84       | -0.31 | -0.23 | -0.09    | -0.26 |
| BY17             | 0.96   | -0.58 | 0.89       | 0.01  | 0.13  | 0.06     | 0.30  |
| BY19             | 0.96   | -0.41 | 0.73       | -0.30 | -0.26 | -0.26    | -0.23 |
| BY20             | 0.24   | 0.03  | 0.19       | 0.44  | 0.48  | 0.64     | 0.61  |
| BY21             | 0.71   | -0.29 | 0.68       | -0.29 | -0.35 | -0.22    | -0.20 |
| BY39             | 0.98   | -0.37 | 0.92       | -0.18 | -0.16 | -0.02    | -0.06 |
| BY42             | 0.88   | -0.18 | 0.70       | 0.20  | 0.11  | 0.29     | 0.17  |
| BY02             | 0.38   | -0.02 | 0.35       | 0.41  | 0.42  | 0.41     | 0.49  |
| BY05             | 0.90   | -0.25 | 0.79       | -0.21 | -0.41 | -0.28    | -0.07 |
| BY08             | 0.92   | -0.35 | 0.88       | 0.04  | -0.10 | 0.17     | 0.29  |
| BY09             | 0.87   | -0.33 | 0.83       | -0.53 | -0.58 | -0.36    | -0.52 |
| BY13             | 0.97   | -0.13 | 0.81       | -0.12 | -0.21 | -0.17    | -0.15 |
| BY14             | 0.88   | -0.60 | 0.72       | -0.11 | -0.05 | 0.07     | -0.25 |
| BY18             | 0.82   | -0.70 | 0.53       | -0.12 | -0.04 | 0.12     | -0.04 |
| BY40             | 0.89   | -0.49 | 0.78       | -0.21 | -0.19 | -0.19    | -0.22 |
| BY41             | 0.94   | -0.28 | 0.93       | -0.03 | -0.12 | -0.04    | -0.05 |
| BY57             | 0.97   | -0.62 | 0.80       | -0.35 | -0.23 | -0.08    | -0.19 |
| BY03             | 0.71   | -0.64 | 0.27       | -0.29 | -0.21 | -0.03    | -0.08 |
| BY23             | 0.91   | -0.42 | 0.95       | 0.08  | 0.11  | 0.09     | 0.10  |
| BY27             | 0.39   | -0.18 | 0.38       | 0.41  | 0.41  | 0.46     | 0.51  |
| BY29             | 0.88   | -0.12 | 0.58       | -0.38 | -0.44 | -0.46    | -0.38 |
| BY50             | 0.75   | -0.13 | 0.70       | 0.27  | 0.47  | 0.36     | 0.36  |
| BY51             | 0.99   | -0.50 | 0.53       | -0.55 | -0.80 | -1.00    | 0.17  |
| BY52             | 0.56   | -0.61 | 0.21       | -0.36 | -0.41 | -0.35    | -0.43 |
| BY54             | 0.97   | -0.69 | 0.73       | -0.42 | -0.33 | -0.15    | -0.08 |
| BY55             | 0.99   | -0.47 | 0.76       | 0.37  | 0.28  | 0.72     | 0.63  |
| BY56             | 0.83   | -0.43 | 0.93       | -0.51 | -0.53 | -0.33    | -0.42 |

Table S4. Correlation between the average CpG methylation level of each single oocyte with that of the merged sample of each maturation stage. Pearson correlation coefficients are listed.

Insert on the right: one example plot of a single oocyte sample (BY16) vs the pooled GV oocytes. Pearson Correlation coefficient = 0.93. Related to Table 1.

| Sample ID | Coefficient |
|-----------|-------------|
| BY06      | 0.91        |
| BY07      | 0.91        |
| BY11      | 0.91        |
| BY16      | 0.93        |
| BY17      | 0.93        |
| BY19      | 0.93        |
| BY20      | 0.82        |
| BY21      | 0.91        |
| BY39      | 0.92        |
| BY42      | 0.93        |
| BY02      | 0.79        |
| BY05      | 0.91        |
| BY08      | 0.91        |
| BY09      | 0.91        |
| BY13      | 0.92        |
| BY14      | 0.92        |
| BY18      | 0.91        |
| BY40      | 0.91        |
| BY41      | 0.93        |
| BY57      | 0.92        |
| BY03      | 0.92        |
| BY23      | 0.91        |
| BY27      | 0.86        |
| BY29      | 0.91        |
| BY50      | 0.85        |
| BY51      | 0.91        |
| BY52      | 0.87        |
| BY54      | 0.92        |
| BY55      | 0.91        |
| BY56      | 0.90        |

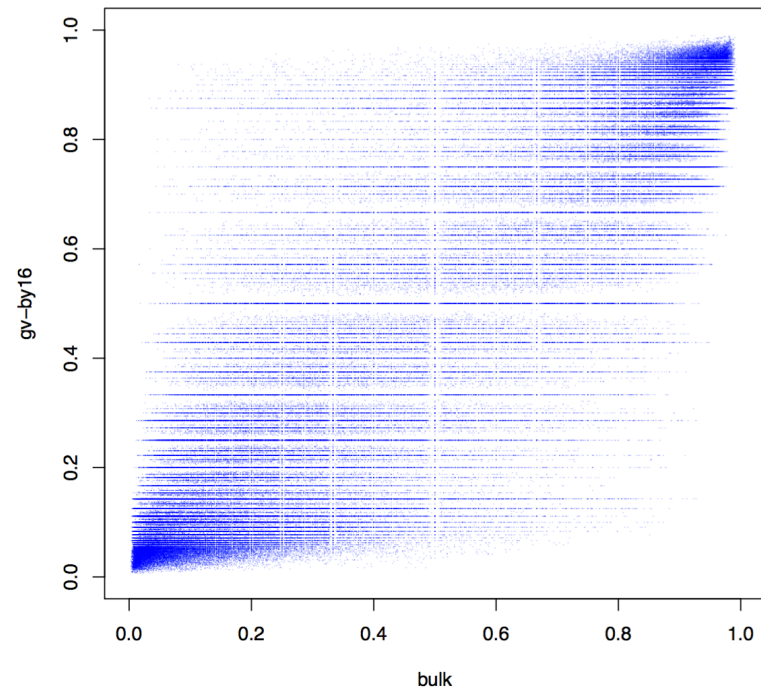

Figure S2. Methylation levels of individual samples. Related to Figure 1.

**A**

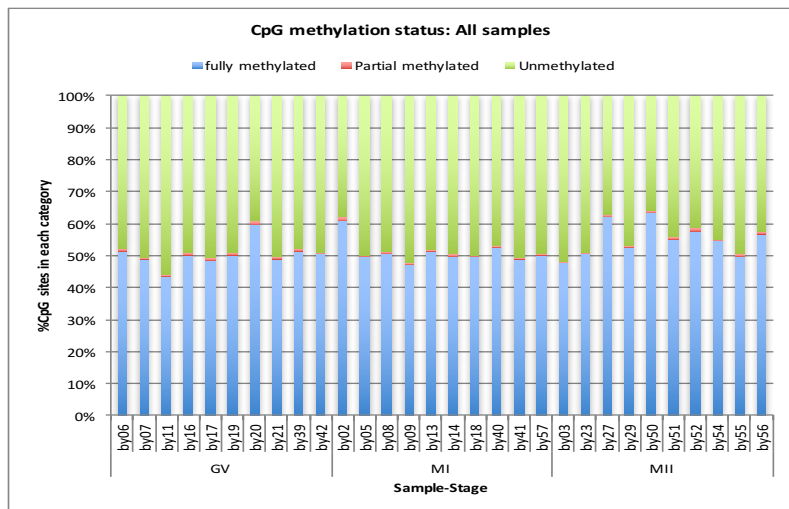

**B**

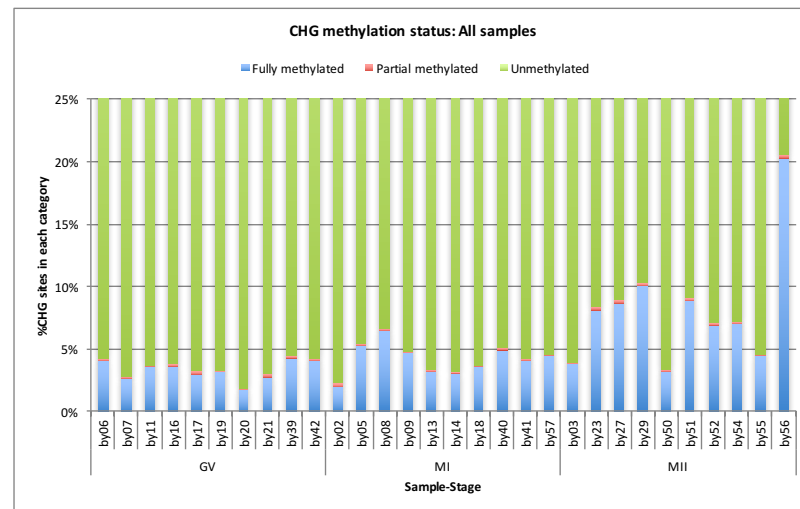

**C**

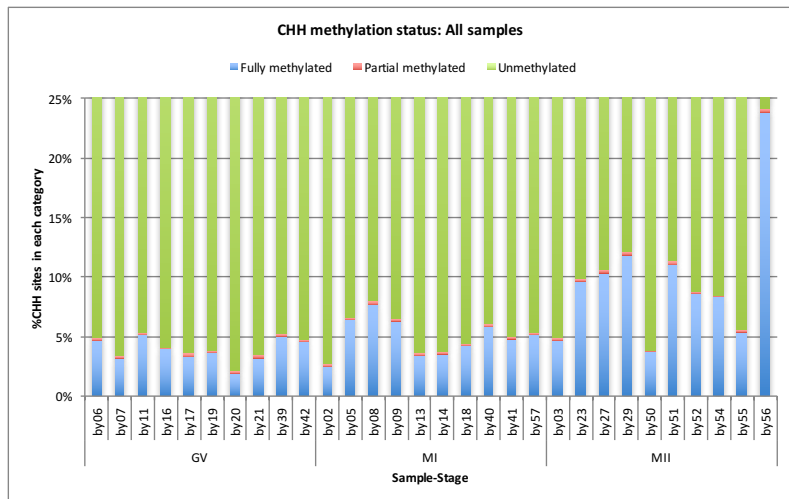

Figure S3. Gene body methylation in relation to intergenic region methylation and gene expression level. Related to Figure 2. n=10 oocytes per maturation stage.

**A**

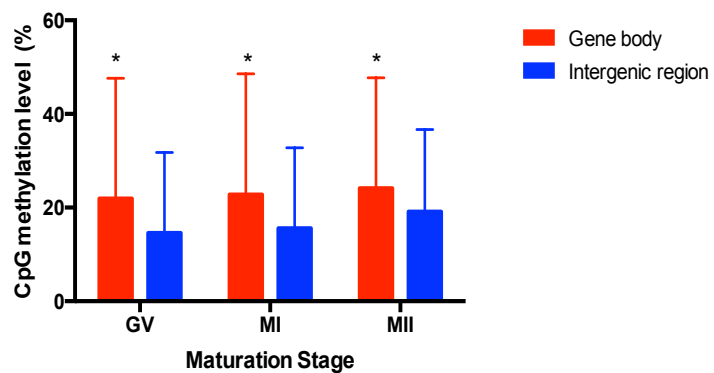

\* Compared to intergenic region, p-value < 0.05, two-sided paired t-test

**B**

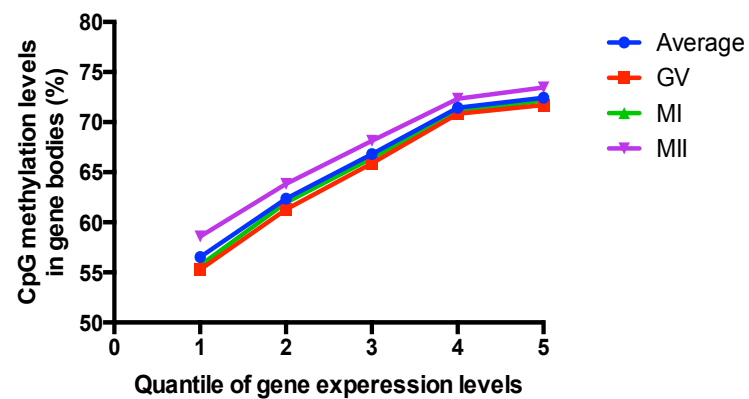



Table S5. Pearson correlation coefficients in Figure 3b,c. Related to Figure 3.

|         | GV_CpG | GV_CHG | GV_CHH | MI_CpG | MI_CHG | MI_CHH | MII_CpG | MII_CHG | MII_CHH |
|---------|--------|--------|--------|--------|--------|--------|---------|---------|---------|
| GV_CpG  | -      | 0.44   | 0.48   | 0.87   | 0.32   | 0.33   | 0.80    | 0.14    | 0.14    |
| GV_CHG  |        | -      | 0.68   | 0.42   | 0.28   | 0.26   | 0.39    | 0.14    | 0.13    |
| GV_CHH  |        |        | -      | 0.45   | 0.27   | 0.30   | 0.42    | 0.13    | 0.15    |
| MI_CpG  |        |        |        | -      | 0.35   | 0.36   | 0.80    | 0.14    | 0.14    |
| MI_CHG  |        |        |        |        | -      | 0.75   | 0.30    | 0.14    | 0.13    |
| MI_CHH  |        |        |        |        |        | -      | 0.31    | 0.13    | 0.15    |
| MII_CpG |        |        |        |        |        |        | -       | 0.22    | 0.21    |
| MII_CHG |        |        |        |        |        |        |         | -       | 0.85    |
| MII_CHH |        |        |        |        |        |        |         |         | -       |

|            | GV_MI_CpG | GV_MI_CHG | GV_MI_CHH | MI_MII_CpG | MI_MII_CHG | MI_MII_CHH |
|------------|-----------|-----------|-----------|------------|------------|------------|
| GV_MI_CpG  | -         | 0.08      | 0.09      | -0.16      | -0.02      | -0.02      |
| GV_MI_CHG  |           | -         | 0.59      | -0.01      | -0.11      | -0.07      |
| GV_MI_CHH  |           |           | -         | -0.01      | -0.08      | -0.10      |
| MI_MII_CpG |           |           |           | -          | 0.16       | 0.16       |
| MI_MII_CHG |           |           |           |            | -          | 0.79       |
| MI_MII_CHH |           |           |           |            |            | -          |

P-values  $<10^{-10}$  in all cases

Figure S4. Venn diagram and genomic distribution of Differentially Methylated Regions (DMRs). Related to Figure 3. n=10 oocytes per maturation stage.

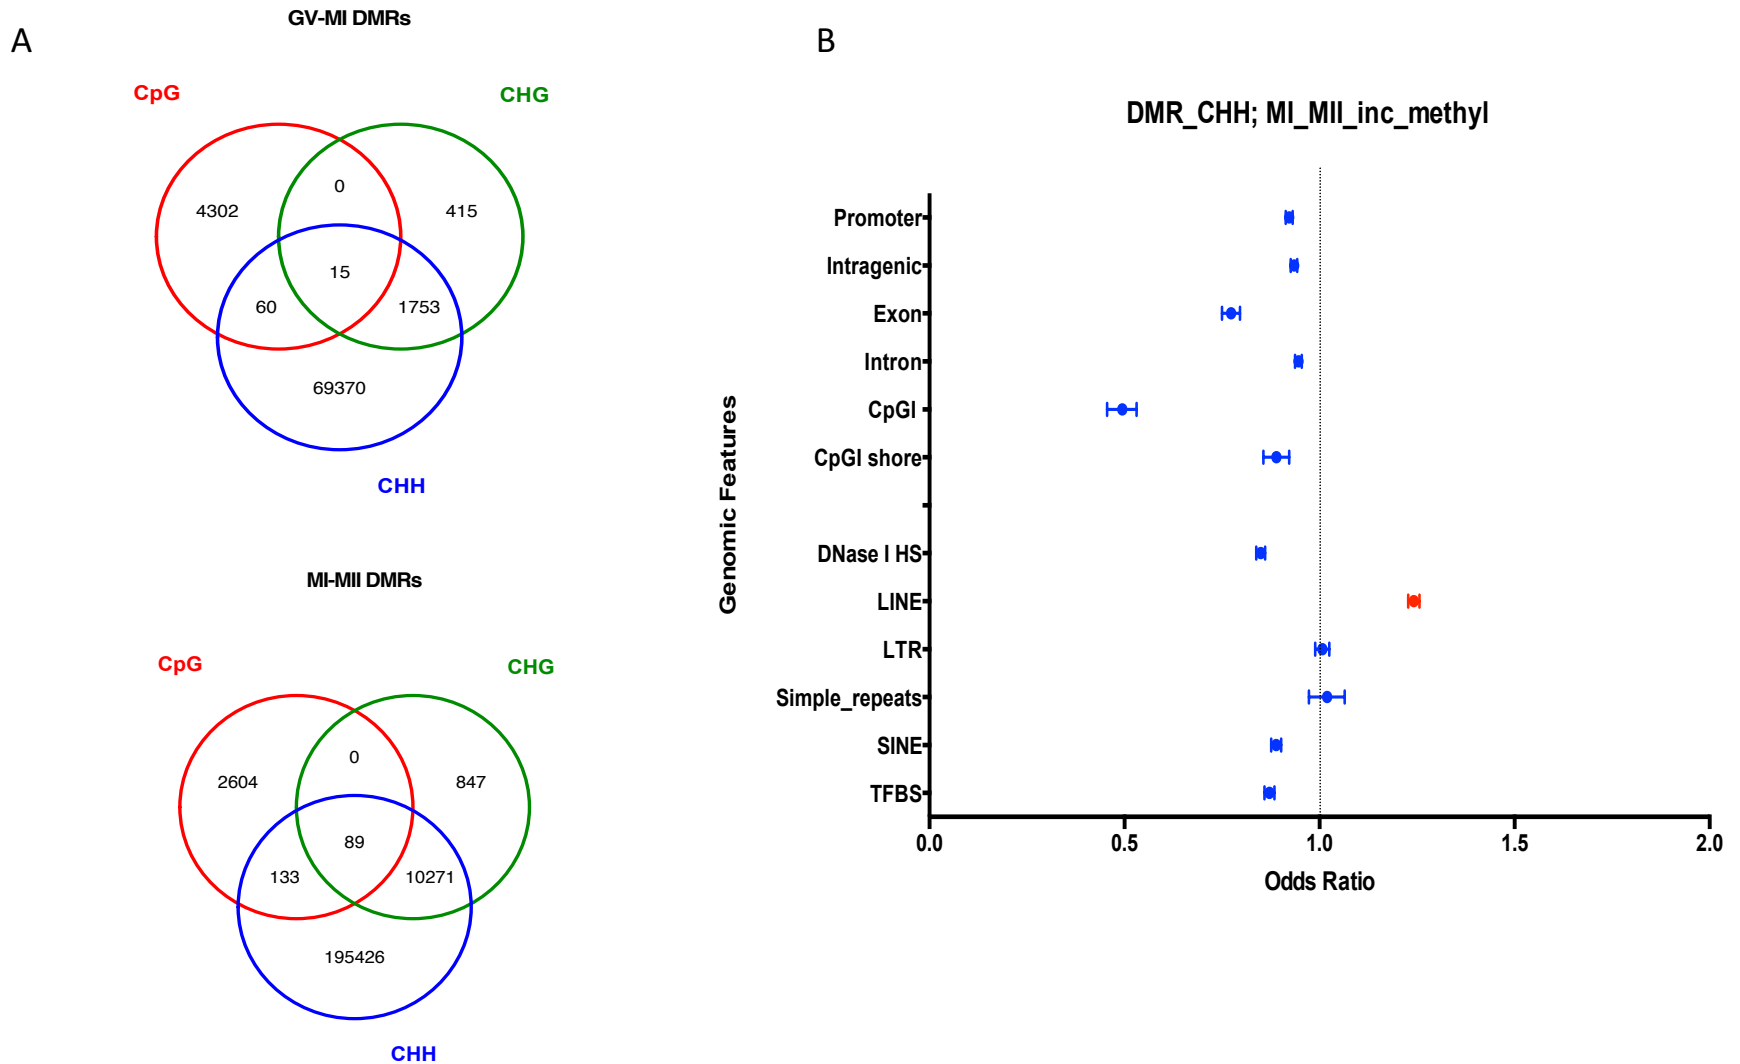

Table S6. Significantly enriched pathways in GO analysis. Related to Figure 3.

| GO Term                                       | Fold Enrichment | P-Value  | FDR      | Stage  | Methylation Change |
|-----------------------------------------------|-----------------|----------|----------|--------|--------------------|
| GO:0044459~plasma membrane part               | 2.00            | 5.24E-10 | 6.90E-07 | GV-MI  | increase           |
| GO:0005886~plasma membrane                    | 1.61            | 1.45E-08 | 1.91E-05 | GV-MI  | increase           |
| GO:0005887~integral to plasma membrane        | 2.03            | 1.43E-05 | 1.88E-02 | GV-MI  | increase           |
| GO:0031226~intrinsic to plasma membrane       | 1.98            | 2.43E-05 | 3.19E-02 | GV-MI  | increase           |
| GO:0030054~cell junction                      | 2.43            | 2.72E-04 | 3.57E-01 | GV-MI  | increase           |
| GO:0006811~ion transport                      | 2.33            | 2.23E-05 | 3.75E-02 | GV-MI  | increase           |
| GO:0031012~extracellular matrix               | 4.36            | 8.57E-05 | 1.07E-01 | MI-MII | decrease           |
| GO:0005578~proteinaceous extracellular matrix | 4.31            | 2.15E-04 | 2.67E-01 | MI-MII | decrease           |
